# Supplementary material
Source: bioRxiv or medRxiv preprint supplement (https://www.biorxiv.org/highwire/filestream/110500/field_highwire_adjunct_files/6/362277-7.pdf)
Supplement: Supplementary file [file 362277-7.pdf]

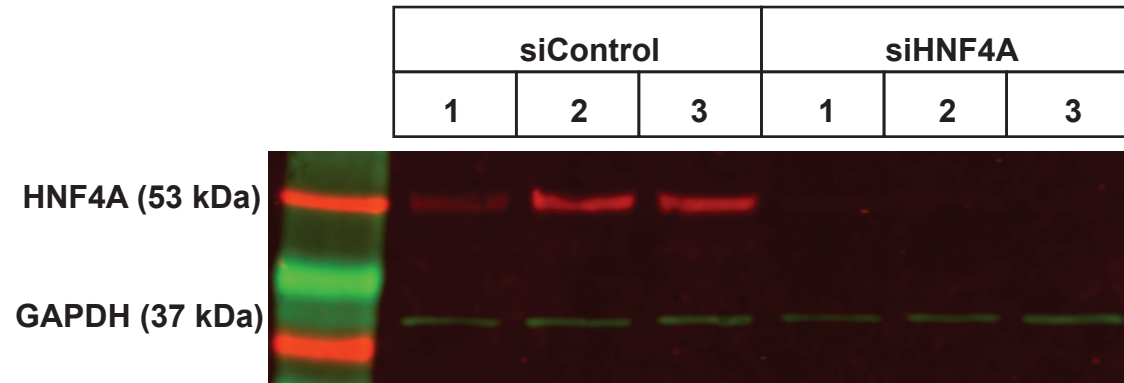

**Figure S6. Western blot analysis of HNF4A siRNA knockdown in HepG2 cells.** HNF4A protein expression was determined in HepG2 cells reverse-transfected with 10 nM *HNF4A* siRNA compared to control siRNA at 48 hours post-transfection. GAPDH was used as normalization control. Quantitation of this blot is presented in figure 4B.
